# Supplementary material
Source: PubMed Central journal article supplement (PMC6291700)
Supplement: ajtr0010-3395-f9.pdf [file ajtr0010-3395-f9.pdf]

ZEB1-AS1 inhibits glioma cancer tumorigenesis via miR-200c/141-ZEB1 axis

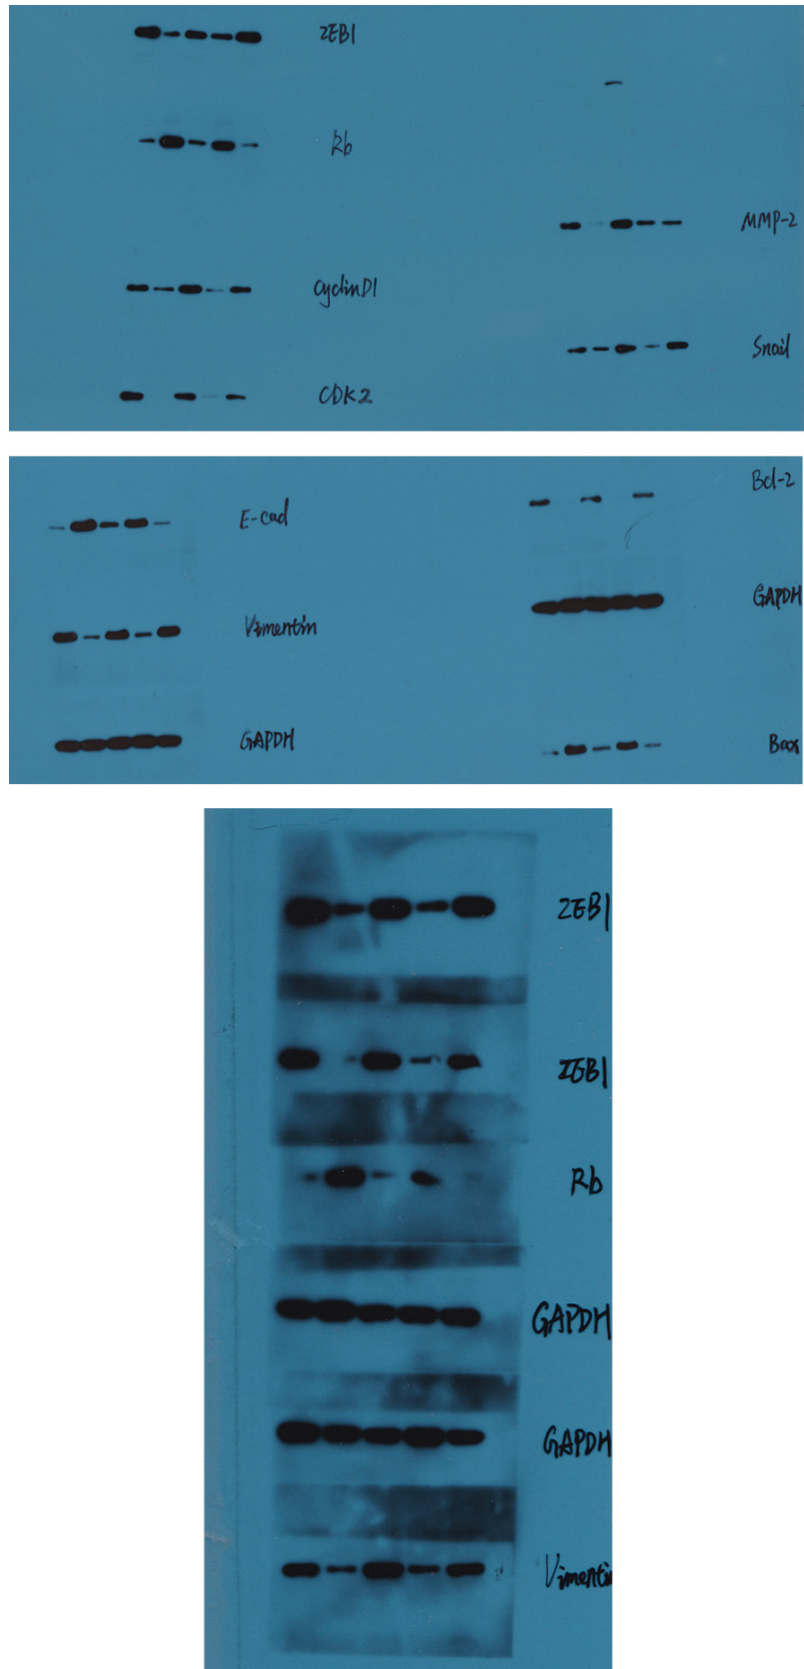

Supplementary Figure 1. The original whole film of western blotting in Figure 7 was presented.
